# Supplementary material for: Case Report: Overlapping Syndrome of Anti-NMDAR Encephalitis and MOG Inflammatory Demyelinating Disease in a Patient With Human Herpesviruses 7 Infection
Source: PubMed Central journal article supplement (PMC9074690; doi:10.3389/fimmu.2022.799454), 2022-04-22

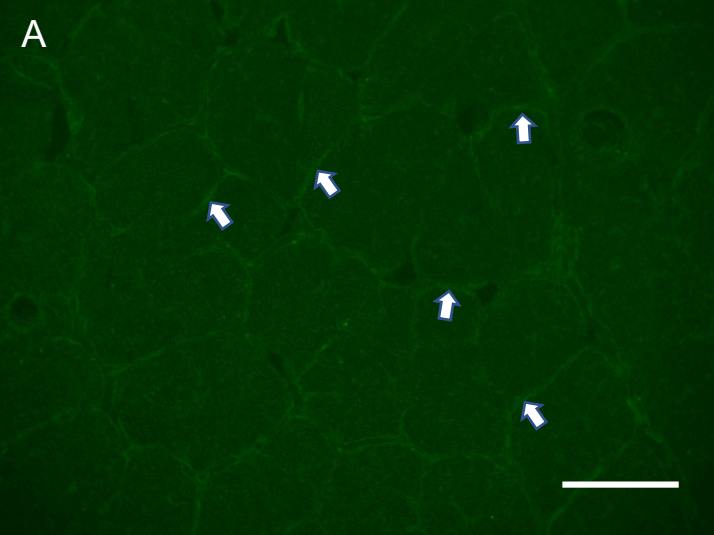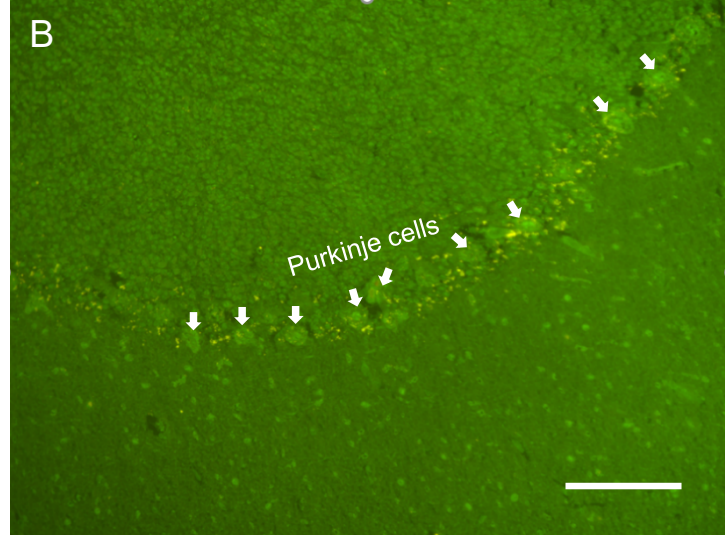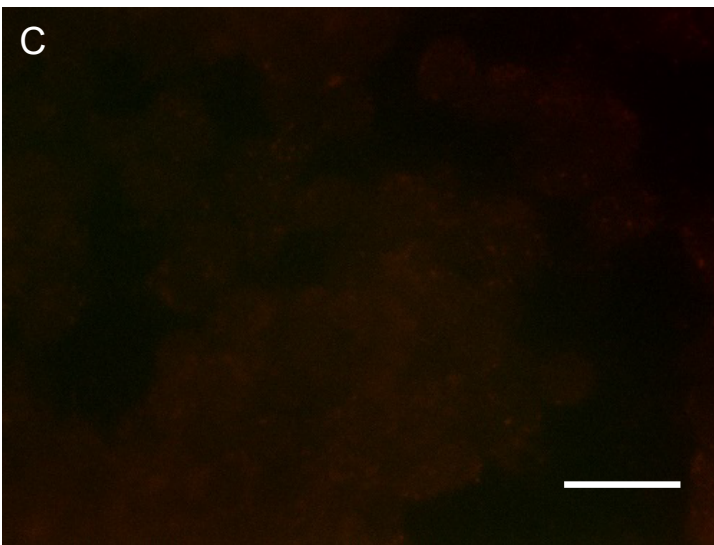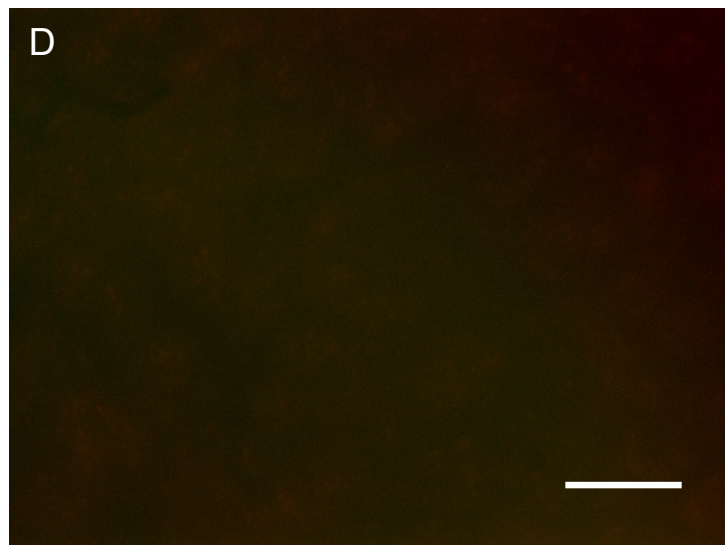

Supplement: Image_1.pdf [file Image_1.pdf]
