# Supplementary material for: Case Report: Overlapping Syndrome of Anti-NMDAR Encephalitis and MOG Inflammatory Demyelinating Disease in a Patient With Human Herpesviruses 7 Infection
Source: PubMed Central journal article supplement (PMC9074690; doi:10.3389/fimmu.2022.799454), 2022-04-22

# Right

# Left

One month

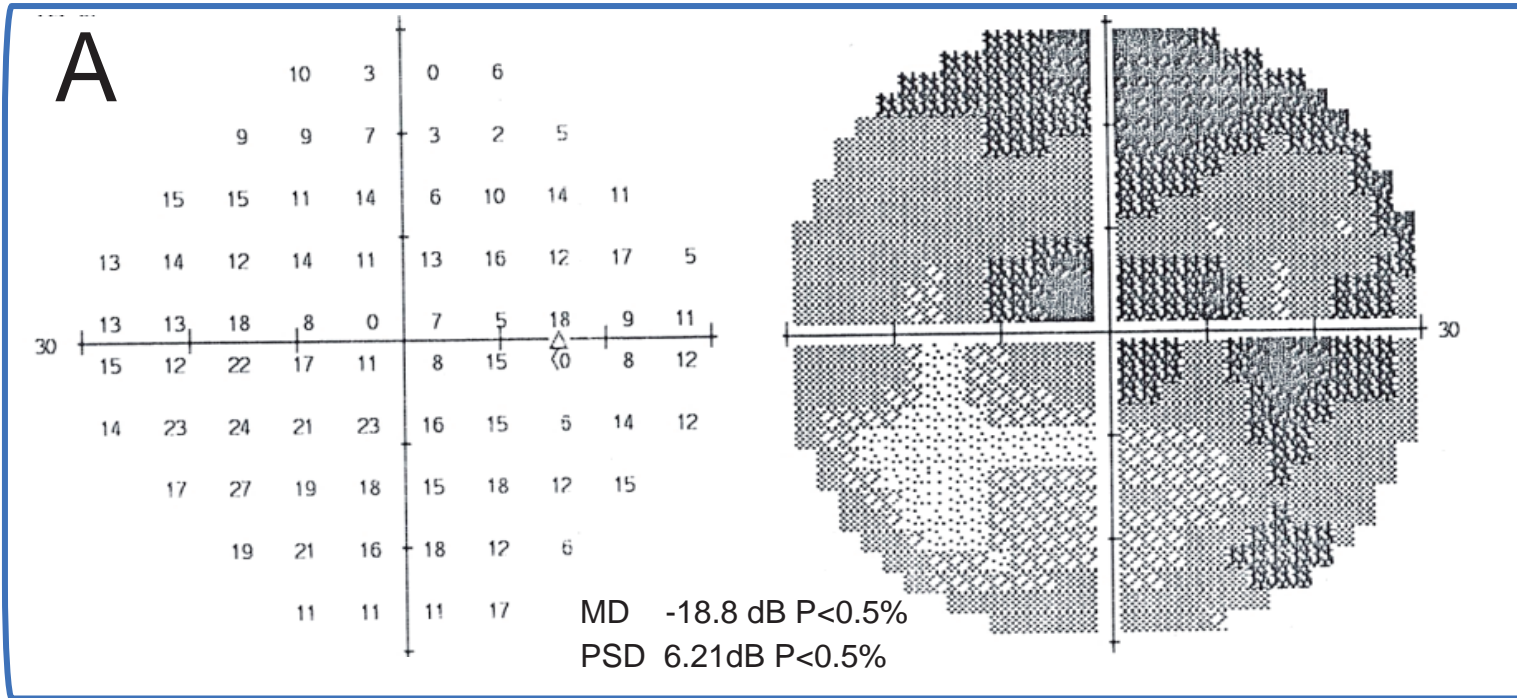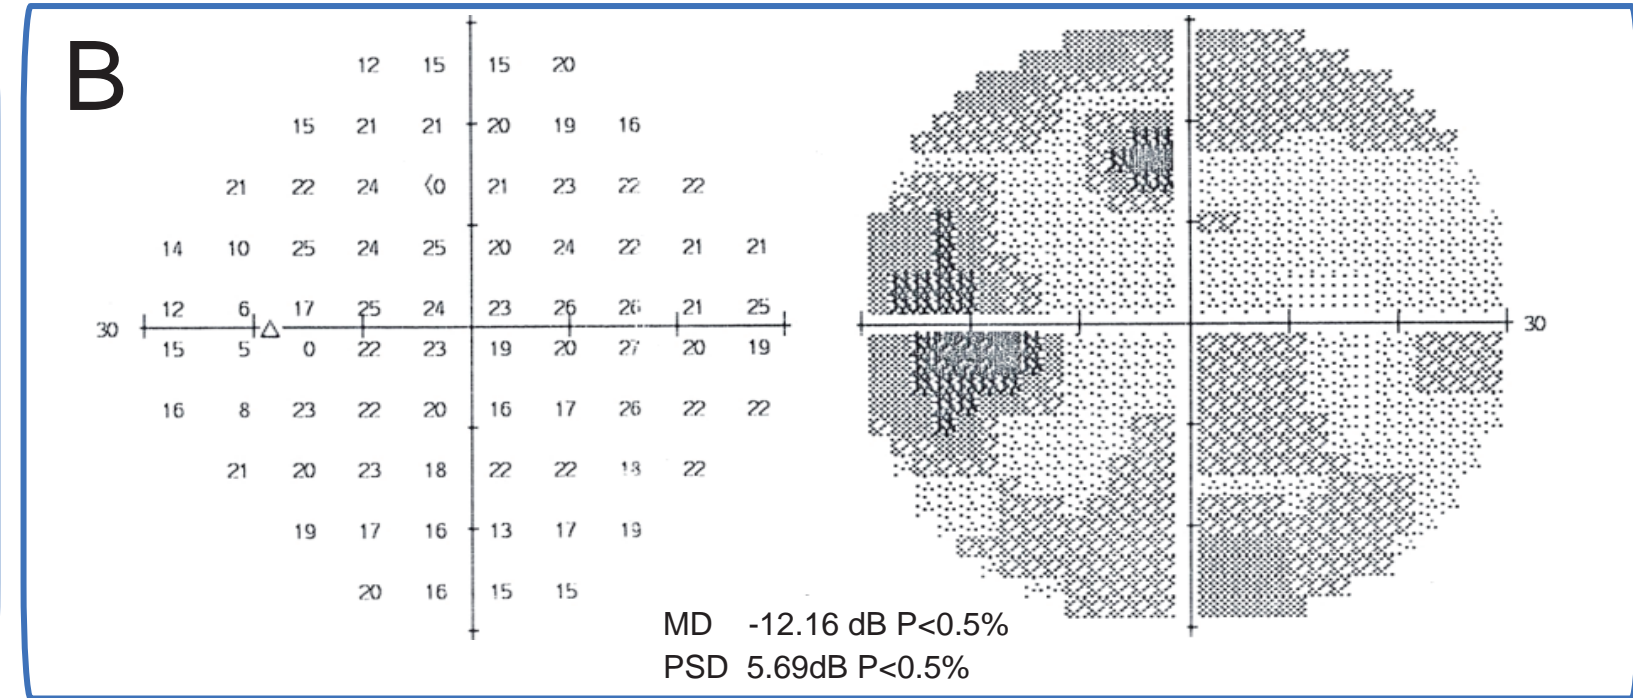

Three months

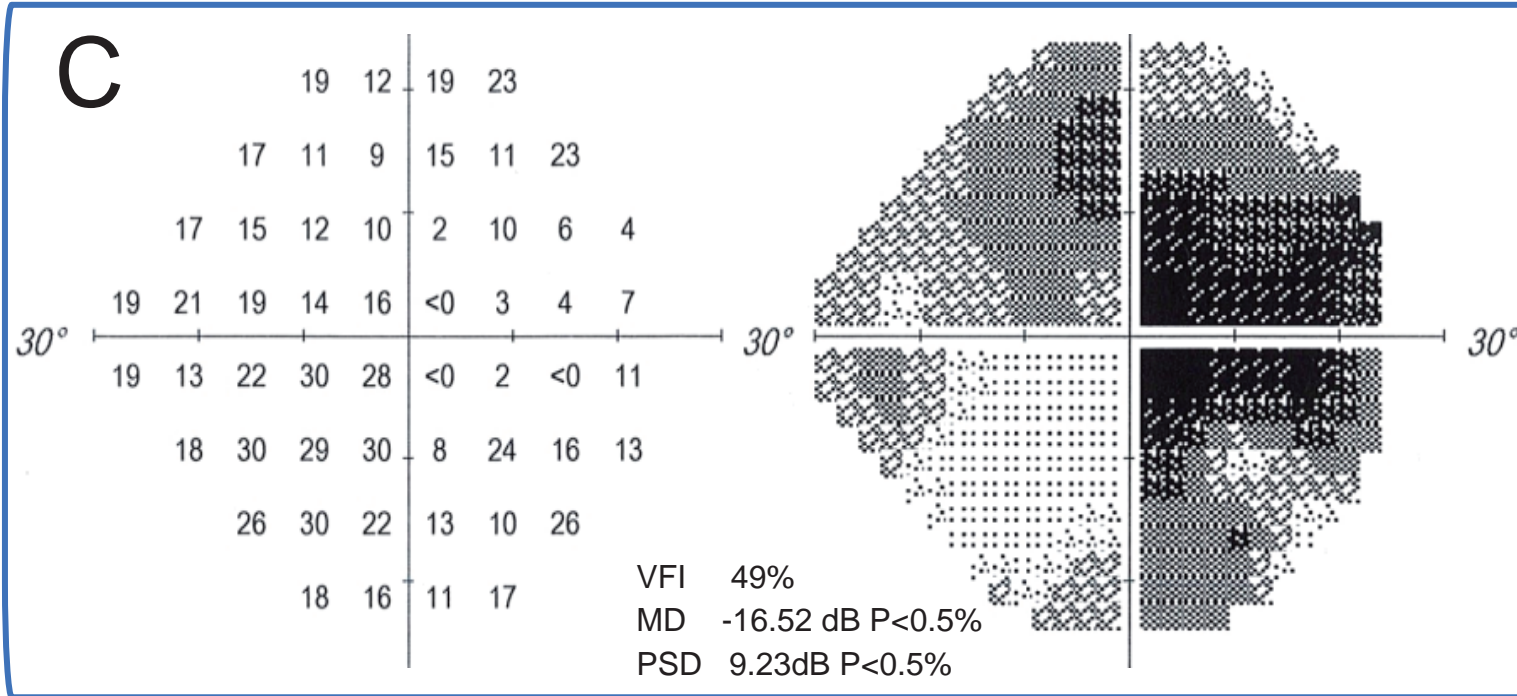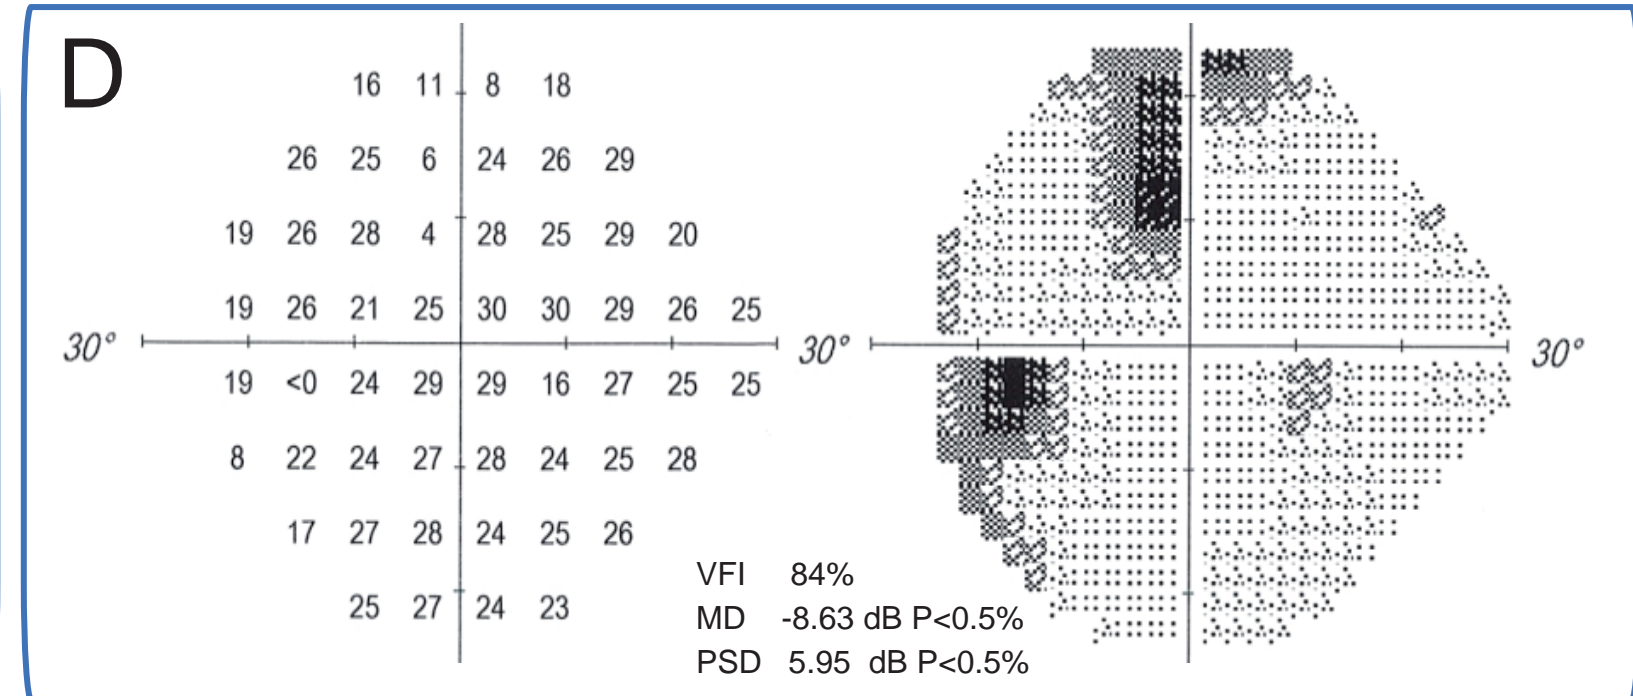

Eight months

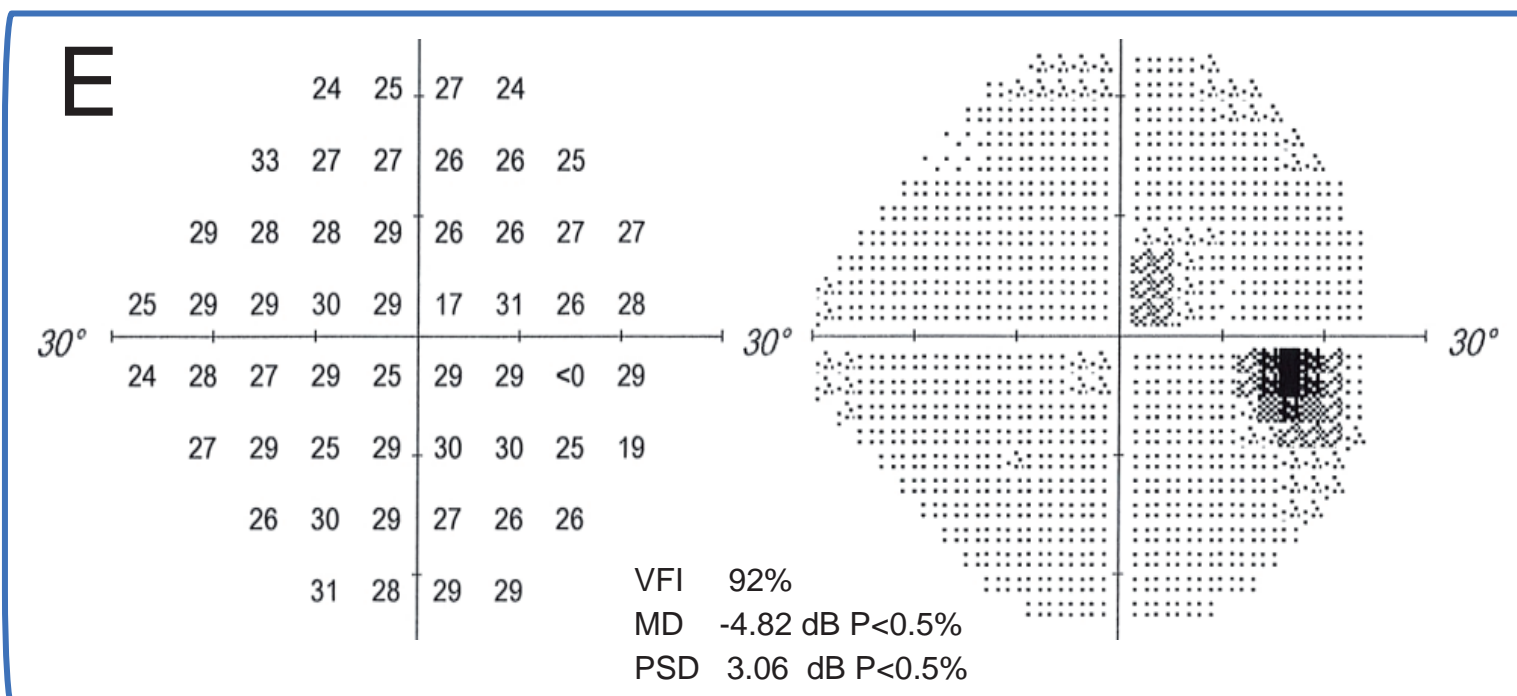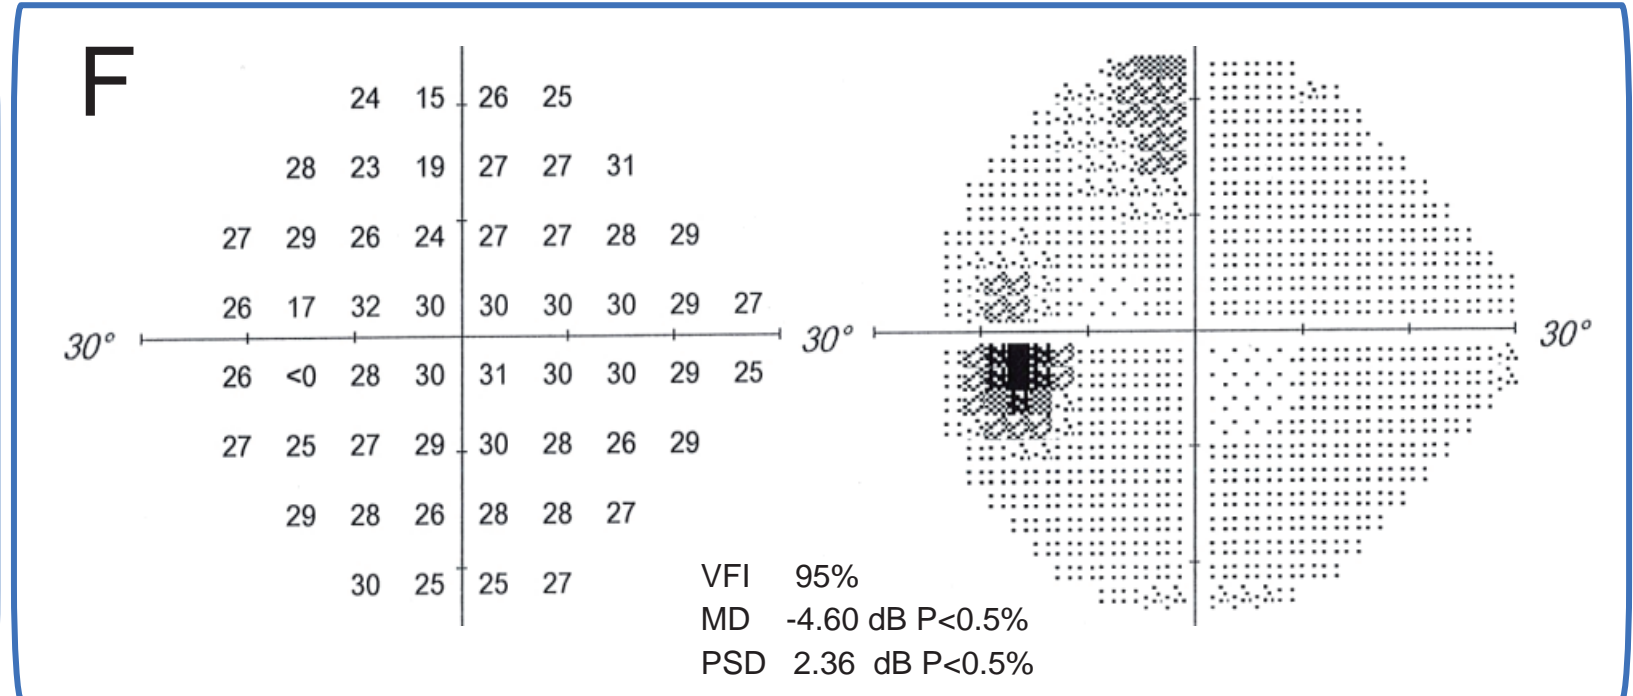

Supplement: Image_2.pdf [file Image_2.pdf]
